# Supplementary material for: 3′HS1 CTCF binding site in human β-globin locus regulates fetal hemoglobin expression
Source: eLife. 2021 Sep 29;10:e70557. doi: 10.7554/eLife.70557 (PMC8500713; doi:10.7554/eLife.70557)
Supplement: Supplementary file 1. — Differential expressed genes ( |log2Fold change| >1 and p-value <0.01) in 3'HS1 deletion and inversion clones. [file elife-70557-supp2.xlsx]

## Sheet:  HUDEP2_3HS_Del_DE_genes
	log2FC (deletion/ WT)	PValue	FDR
VENTX	8.37327	2.42e-11	1.33e-08
LIN28B	5.5086	1.7e-10	7.47e-08
HBG1	5.27642	1.3e-60	8.55e-57
PDE3A	5.26724	2.05e-07	4.67e-05
PRSS8	5.24122	1.2e-09	4.54e-07
HBG2	5.07441	1.61e-111	2.12e-107
BGLT3	4.8059	1.62e-13	1.58e-10
OBSL1	4.63889	1.48e-09	5.43e-07
HBE1	4.38405	9.4e-05	0.00931844
NAT8L	4.20145	0.00010977	0.0106469
GPSM1	3.90818	2.14e-06	0.000339433
SEMA3E	3.77823	7.85e-14	9.42e-11
TCEAL9	3.76185	5.95e-07	0.000113699
LRAT	3.70775	4.7e-05	0.00500502
PURPL	3.57215	8.11e-05	0.00822694
TFAP2A-AS1	3.56798	0.000284546	0.02195
ISL2	3.47055	1.87e-06	0.00030946
EHD2	3.46085	5.74e-05	0.00600699
OR2AT4	3.38175	3.42e-05	0.00385594
NEBL	3.37294	5.77e-06	0.00083687
LGALS3BP	3.36482	4.41e-06	0.000661028
PACSIN1	3.34442	0.000417378	0.0292853
TFAP2A	3.3106	3.65e-07	7.4e-05
BEX3	3.26135	5.1e-06	0.000756239
SERPINB6	3.21636	9.63e-06	0.00127085
CA13	3.19907	9.24e-06	0.0012305
HBBP1	3.1657	1.08e-29	2.86e-26
GBP2	3.16069	1.87e-05	0.00228068
TNNT1	3.13926	0.000142764	0.0130778
SH3BGRL2	3.12949	2.05e-09	7.29e-07
PANX2	3.12737	1.68e-10	7.47e-08
HBZ	3.08842	1.97e-07	4.55e-05
MYO18B	3.08596	1.3e-10	6.11e-08
PALM	3.06011	1.3e-07	3.13e-05
ALDH1A1	3.04324	0.000831433	0.0493609
P2RX7	2.97802	0.000482166	0.0329546
STXBP6	2.96444	1.41e-05	0.0017503
SCN2A	2.96212	2.63e-05	0.00311974
ANXA1	2.92507	7.23e-06	0.00102191
FAM162B	2.9126	0.00381531	0.145897
LINC02212	2.8841	0.000201896	0.0164876
FAM222A-AS1	2.82241	0.000217794	0.0175178
MFGE8	2.81101	2.71e-08	7.94e-06
TMEM45A	2.79864	0.00013569	0.0127849
KRT19	2.7921	4.06e-05	0.00446023
VIM-AS1	2.7586	0.000377326	0.027499
SLC16A10	2.72726	4.41e-06	0.000661028
F2RL3	2.68135	0.000166206	0.0148137
MGST1	2.61283	8.78e-07	0.000160839
COL2A1	2.52067	6.38e-08	1.68e-05
ID4	2.45739	0.00155748	0.075532
PRXL2A	2.43769	0.000179963	0.0155302
CRYM	2.3912	6.48e-05	0.0067293
ZNF467	2.39063	0.00403551	0.149951
C14orf39	2.38878	0.000909972	0.0511102
APLNR	2.38581	1.27e-05	0.00161255
ANO1	2.34019	0.000700527	0.0427808
PCDH9	2.32985	0.00728709	0.216635
BEX2	2.28603	7.49e-08	1.9e-05
VIM	2.28424	1.03e-06	0.000183591
SH2D6	2.28171	0.000167588	0.0148366
POU3F2	2.27886	0.00285689	0.118507
TNNI3	2.27624	0.000889525	0.0511102
LOC780529	2.26683	0.00483529	0.171538
MYLK3	2.19395	0.000399095	0.0283036
AMHR2	2.12115	0.000266611	0.0206875
APPL1	2.11044	1.15e-09	4.47e-07
RHOC	2.09241	7.05e-07	0.000132928
TTLL13P	2.08999	0.0061443	0.199139
GAMT	2.0614	0.0017475	0.0832176
TMCC3	2.05929	0.00875649	0.243172
RGS20	2.05198	0.00419309	0.152372
OTX1	2.02412	0.00313516	0.125702
PDK4	2.02296	0.00997006	0.262505
SLC37A1	2.011	0.00103701	0.0565255
RENBP	2.00348	2.83e-09	9.57e-07
ERO1B	2.0008	0.000891209	0.0511102
IL12RB1	1.96812	0.00644455	0.202667
COL9A2	1.95534	0.00409911	0.151037
IGF2BP1	1.91466	7.56e-16	1.11e-12
LRRC14B	1.90291	0.00714669	0.214742
RIIAD1	1.89167	0.00193848	0.090037
RTN2	1.87431	0.0096046	0.256466
WIPF1	1.86859	0.000909809	0.0511102
EPAS1	1.86709	5.29e-07	0.000104176
ITM2A	1.85364	1.17e-06	0.000206282
REEP6	1.8484	1.94e-11	1.11e-08
CHN1	1.80744	0.00697969	0.211168
ZNF697	1.80689	0.00291711	0.119502
GGT1	1.77345	0.000517608	0.0341388
ALOX12	1.73874	0.00639587	0.202667
CA11	1.7271	0.00418266	0.152372
DPF1	1.72517	0.00265447	0.112952
LIF	1.71529	0.0055982	0.188763
ITGB5	1.70387	0.00611138	0.19856
PLAGL1	1.68693	2.91e-07	6.39e-05
PTPRC	1.67638	4.45e-05	0.00481248
DLGAP1-AS2	1.6664	0.0073687	0.217938
ICAM1	1.65671	0.002003	0.0923833
TNIK	1.64143	4.41e-08	1.21e-05
NETO2	1.64138	0.00269261	0.113477
AXL	1.62655	0.00813944	0.234427
FAM13A	1.60352	0.000142301	0.0130778
LOC101927789	1.58817	0.00302771	0.122888
KRT13	1.58671	1.97e-06	0.000316621
MT1G	1.56237	0.0019532	0.0904021
GAB2	1.54915	4.67e-10	1.93e-07
CDKN1A	1.54848	0.00126753	0.0653127
KCNE1	1.54308	0.00832871	0.237287
EMID1	1.52993	9.19e-07	0.000166095
PNMT	1.52048	5.73e-07	0.000111076
HMOX1	1.51955	0.00824952	0.236489
LRRC7	1.51118	0.000802438	0.0478958
PIK3CG	1.49635	0.0091234	0.250471
MELTF	1.49421	0.00996158	0.262505
TSPAN32	1.47878	7.65e-13	5.6e-10
SMAD5	1.46553	0.000140698	0.0130778
TANC1	1.46074	1.83e-06	0.00030946
CHPF	1.45948	0.00645289	0.202667
C11orf21	1.45893	8.67e-14	9.53e-11
SPIN3	1.44698	0.00567611	0.188763
ZGLP1	1.4376	0.00108012	0.0583931
LCP1	1.42147	1.94e-11	1.11e-08
SLC29A2	1.40586	0.00492574	0.172807
GDF15	1.39715	4.91e-10	1.96e-07
PTGS1	1.37618	6.29e-11	3.19e-08
VAT1	1.37599	8.69e-07	0.000160839
SAMSN1	1.37413	0.00119913	0.0622247
DDN	1.36396	0.000142668	0.0130778
RNF144A-AS1	1.34962	0.00513862	0.17791
LRP12	1.3455	0.00284541	0.118403
ABCC13	1.34193	0.00350678	0.136858
ANKRD18A	1.33997	0.00427079	0.154345
WSCD2	1.32785	0.00729571	0.216635
CLCF1	1.31955	0.00548364	0.187396
HPGD	1.31316	2.97e-06	0.000466854
SHB	1.31099	0.00306287	0.123934
ZFPM2	1.30529	0.00894069	0.247247
CPED1	1.28374	0.000127467	0.0120965
FYN	1.28354	0.000508278	0.0336919
C17orf99	1.27352	4.59e-08	1.24e-05
PLXNB3	1.25851	0.00608149	0.198544
LRTM2	1.25527	0.00018656	0.0157751
CORO2A	1.23136	0.00554151	0.188397
EZR-AS1	1.22617	0.00951025	0.256466
KSR1	1.18506	3.73e-09	1.2e-06
TNFRSF14-AS1	1.14336	0.00381844	0.145897
FAM78A	1.1271	0.00142656	0.0720985
PIP4P2	1.12334	0.00359359	0.139832
RUNDC3A	1.1095	2.67e-05	0.00314115
CAVIN1	-1.10086	0.000615406	0.0389217
ARHGEF37	-1.10903	0.00850532	0.23973
SNCA	-1.1422	5.77e-11	3.05e-08
CR1L	-1.1424	3.25e-07	7.03e-05
JAKMIP1	-1.15133	0.000333165	0.025113
AQP1	-1.15575	1.41e-14	1.86e-11
AKAP12	-1.1605	0.00680895	0.208447
ZMIZ1	-1.16911	0.00188	0.0882528
SYK	-1.16962	1.34e-05	0.00168612
PPP4R1	-1.18313	1.56e-08	4.78e-06
SCARNA17	-1.20559	0.0074934	0.221131
AGPAT4	-1.21143	0.00953398	0.256466
ITGA5	-1.21944	0.000674356	0.0417626
PLEC	-1.22146	0.00127822	0.0656071
COX6B2	-1.22504	0.00454097	0.162772
FHL2	-1.2297	0.00233091	0.102833
ITPKB	-1.2344	1.03e-05	0.00134386
FGFRL1	-1.2448	5.75e-06	0.00083687
LMO7	-1.24989	0.000545216	0.035364
CTH	-1.25114	0.00572146	0.189152
MTCL1	-1.27218	0.000494181	0.0334294
EVA1C	-1.27511	0.00178434	0.0843629
IQSEC3	-1.28967	0.00267834	0.113237
TNS1	-1.29348	0.000902173	0.0511102
COL15A1	-1.30675	0.00407086	0.150417
SLC50A1	-1.32103	4.12e-08	1.16e-05
PMP22	-1.3503	0.000356919	0.0265995
TLN2	-1.37957	0.000203646	0.0164876
H1-2	-1.39947	7.29e-12	4.81e-09
FCGRT	-1.42343	0.00544847	0.187396
HSPG2	-1.43042	0.00621307	0.200348
NCS1	-1.4399	8.53e-06	0.00116046
C11orf80	-1.44994	0.00670112	0.206685
PPM1E	-1.45314	0.00398543	0.149352
RN7SL2	-1.46879	0.00721987	0.216448
RN7SL1	-1.48216	0.00156893	0.0758087
SAMD9	-1.48635	9.83e-11	4.8e-08
MYO6	-1.48862	0.00083447	0.0493609
AACS	-1.49469	4.03e-06	0.000618357
RMRP	-1.49714	0.00976196	0.259095
GMFG	-1.50279	0.00238386	0.10447
CYP1B1	-1.50394	2.71e-09	9.42e-07
TBC1D1	-1.50936	1.88e-05	0.00228068
SEMA4D	-1.51232	0.0085593	0.24066
ZEB1-AS1	-1.52476	0.00311333	0.12559
TRIM10	-1.53842	0.00850445	0.23973
CFAP161	-1.5526	0.00420566	0.152409
RARG	-1.56717	0.00284205	0.118403
RPS6KA2	-1.58778	0.00058953	0.0375676
MDGA1	-1.59646	0.000662454	0.041219
H2BC3	-1.60537	0.00622717	0.200348
AK7	-1.63573	0.000890946	0.0511102
CDH6	-1.64258	0.00201583	0.0926508
BOK	-1.66147	0.00609586	0.198544
CLIP2	-1.67514	0.000203736	0.0164876
PDCD6IPP2	-1.68359	0.00629386	0.202001
LINC01133	-1.68505	3.59e-09	1.18e-06
DHRS3	-1.71406	0.000365331	0.0270735
SERPINB1	-1.72062	0.00252885	0.108444
HSPA2	-1.72142	4.51e-05	0.00483239
ITGB7	-1.72382	0.00620502	0.200348
NTRK1	-1.75381	1.08e-05	0.00140147
ZEB1	-1.75916	0.000529486	0.0345765
ZNF441	-1.7789	6.01e-06	0.000862107
CAMK2D	-1.7983	0.00604701	0.197931
LRP1	-1.82813	9.13e-06	0.00122896
CFAP54	-1.85033	0.00568106	0.188763
PLEKHH2	-1.85782	0.000397077	0.0283036
RPPH1	-1.87265	0.000616681	0.0389217
GFOD1	-1.8795	2.54e-07	5.68e-05
ID3	-1.91806	0.00802476	0.232048
MFSD6	-1.94323	0.00266313	0.112956
RFTN1	-1.9517	0.000914411	0.0511102
GIPC2	-1.98647	0.00933526	0.2539
RPL3L	-2.00742	0.00761282	0.224153
NT5E	-2.01561	0.00288634	0.118975
ICOSLG	-2.03532	0.000747292	0.045218
TEAD4	-2.14153	0.000742997	0.0451653
NDRG1	-2.14671	4.59e-18	7.57e-15
REC8	-2.14869	1.66e-08	4.99e-06
EFNA1	-2.16269	0.00287838	0.118975
FMNL3	-2.17866	0.00328094	0.128531
PCDH1	-2.18265	0.00148631	0.0737066
RYR3	-2.19836	0.000374647	0.0274554
COLQ	-2.23665	3.37e-05	0.00382983
ACAP1	-2.27346	0.000183778	0.0156986
CYTL1	-2.27863	0.00563054	0.188763
C3orf14	-2.29991	0.00564226	0.188763
H3-2	-2.30094	0.00815818	0.234454
MAP3K5	-2.31501	2.47e-13	2.17e-10
HUNK	-2.32636	1.62e-12	1.13e-09
IL4R	-2.34912	1.6e-07	3.76e-05
CPVL	-2.41243	3.7e-13	2.87e-10
BCL2L15	-2.42012	0.00367711	0.142661
ANKRD20A8P	-2.46241	0.000317278	0.0240529
CNN3	-2.47523	3.55e-07	7.32e-05
NECTIN1	-2.4939	1.46e-18	2.75e-15
UACA	-2.50053	1.99e-05	0.0023885
ZNF354C	-2.51354	0.000107718	0.0105253
FAM95A	-2.5266	0.000870937	0.0508342
NXF3	-2.54723	0.00484953	0.171538
SLFN13	-2.59989	9.72e-09	3.05e-06
CHSY3	-2.60122	0.000184465	0.0156986
LCP2	-2.60295	0.000549589	0.035364
NELL2	-2.6032	3.32e-05	0.00380307
IL18	-2.60519	0.00010216	0.0100567
LIPE-AS1	-2.61345	1.91e-06	0.00031072
SLFN12	-2.66434	4.17e-05	0.00454352
MIR10396A	-2.70992	0.000410743	0.0289739
DOCK5	-2.76525	0.000913244	0.0511102
CHN2	-2.82689	7.68e-06	0.00106595
BCAM	-2.85889	1.29e-11	8.11e-09
PEG3	-2.86041	0.00320272	0.126868
VLDLR	-2.87598	0.00132345	0.0674042
PAQR8	-2.9497	0.000244274	0.0192948
GPR161	-2.97447	9.1e-08	2.26e-05
ZNF572	-3.05286	0.000195086	0.0163909
GASK1B	-3.05755	0.000156397	0.0141303
CPLANE1	-3.07948	0.000384114	0.0278399
LINC01978	-3.08718	3.01e-05	0.00347874
LINC02476	-3.09862	0.000340858	0.0255469
LOC102724301	-3.36579	0.000694078	0.0425841
FAM20C	-3.40383	0.000306046	0.0233356
PHETA2	-3.55873	0.00155561	0.075532
DZIP1	-3.81958	0.00114625	0.0609686
CREB3L1	-4.00296	0.000466627	0.0322265
LINC00989	-4.1855	1.68e-13	1.58e-10
ARHGAP5	-4.1964	3.69e-35	1.62e-31
LAMC3	-4.31213	5.59e-05	0.00590244
CABLES1	-4.39999	0.00690269	0.2098
B3GALNT1	-4.49539	4.14e-08	1.16e-05
MAL	-4.68969	7.28e-06	0.00102191
ZNF563	-5.45887	1.95e-10	8.32e-08
SLFN11	-5.55181	1.88e-06	0.00030946
ZNF141	-5.76453	6.91e-08	1.79e-05
PERP	-5.83387	2.82e-13	2.33e-10
SATB1	-6.52961	1.06e-25	2.32e-22
RNLS	-6.86232	1.44e-06	0.000246486
PLS3	-11.731	1.75e-34	5.77e-31

## Sheet:  HUDEP2_3HS_Iverstion_DE_genes
	log2FC(inversion vs WT)	PValue	FDR
OR52A5	4.32312	0.00174634	0.894546
TFAP2A	3.80379	0.00258391	0.999932
MALT1	1.76011	0.00333306	0.999932
HBG2	-1.27336	0.00861584	0.999932
CYB5A	-1.3779	0.00386127	0.999932
H1-2	-1.44122	0.00610148	0.999932
SNCA	-2.11376	7.27e-06	0.0116433
LOC100129129	-2.51161	0.00282434	0.999932
ZNF799	-2.77447	0.00834004	0.999932
LINC00989	-2.77775	0.00547719	0.999932
ZNF229	-2.86469	0.0042757	0.999932
ZNF568	-2.87108	0.00613483	0.999932
SP9	-2.9203	0.00726132	0.999932
ZNF829	-2.93997	0.00427118	0.999932
ZNF615	-2.98938	0.00870276	0.999932
SLC2A14	-3.03595	0.00979843	0.999932
ARHGAP32	-3.19297	0.00659914	0.999932
RNVU1-18	-3.21372	0.00520868	0.999932
FAM167A-AS1	-3.22275	0.00756056	0.999932
SMPX	-3.49171	0.00211564	0.999932
ZIK1	-3.4938	0.000815395	0.474634
HR	-3.49852	0.00149382	0.79708
ZNF471	-3.53191	0.00204133	0.999932
EPS8	-3.55216	0.00531495	0.999932
RRAS2	-3.66401	0.00485723	0.999932
ZNF726	-3.66625	0.00537275	0.999932
MAP7D2	-3.6907	0.00071305	0.456566
ZNF528-AS1	-3.76801	0.0070836	0.999932
ZFP28	-3.81777	0.0045737	0.999932
ZNF528	-3.85284	0.00245982	0.999932
TMEM233	-3.85671	9.44e-05	0.100769
PLXNA2	-3.88548	0.00301291	0.999932
ZNF354C	-4.34702	0.000639755	0.431195
GIPC2	-4.38045	0.00264262	0.999932
FAT1	-4.51493	0.00061682	0.431195
SERPINB1	-4.76997	0.000618253	0.431195
ZNF677	-4.82264	0.00267983	0.999932
ZNF738	-4.88179	0.00114215	0.635927
ITGB5	-4.89547	0.00076094	0.464029
SFMBT2	-5.02232	0.000147601	0.126012
ZNF71	-5.57159	0.000243175	0.194631
C5orf66-AS1	-5.65632	0.000139302	0.126012
PTPRK	-5.7525	0.000104774	0.103211
ZNF141	-6.07703	1.02e-06	0.00261022
ZNF788P	-7.17002	2.49e-08	0.000159293
ZNF347	-7.46031	1.23e-06	0.00262546
ZNF470	-7.94172	5.59e-05	0.0651306
PEG3	-8.11199	9.97e-08	0.000425711
ZNF44	-8.13789	2.93e-05	0.0417057
ZSCAN18	-8.2514	4.8e-05	0.0614528
ZNF563	-8.59312	6.06e-06	0.0110926
POMC	-9.46284	8.32e-07	0.00261022
PLS3	-11.1772	2.35e-10	3.01e-06
