# Supplementary figures and images for: 3′HS1 CTCF binding site in human β-globin locus regulates fetal hemoglobin expression
Source: eLife journal article supplement (doi:10.7554/elife.70557), 2021-09-29

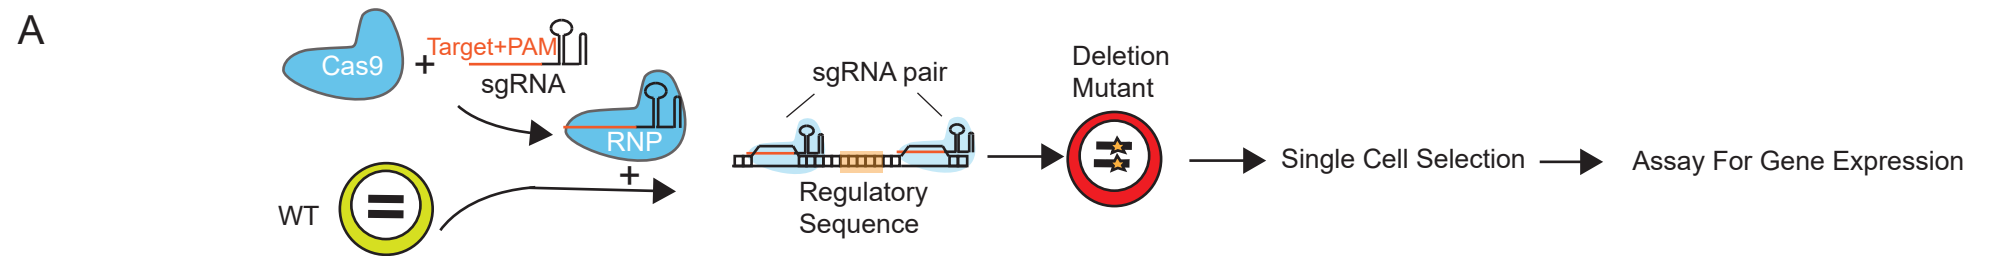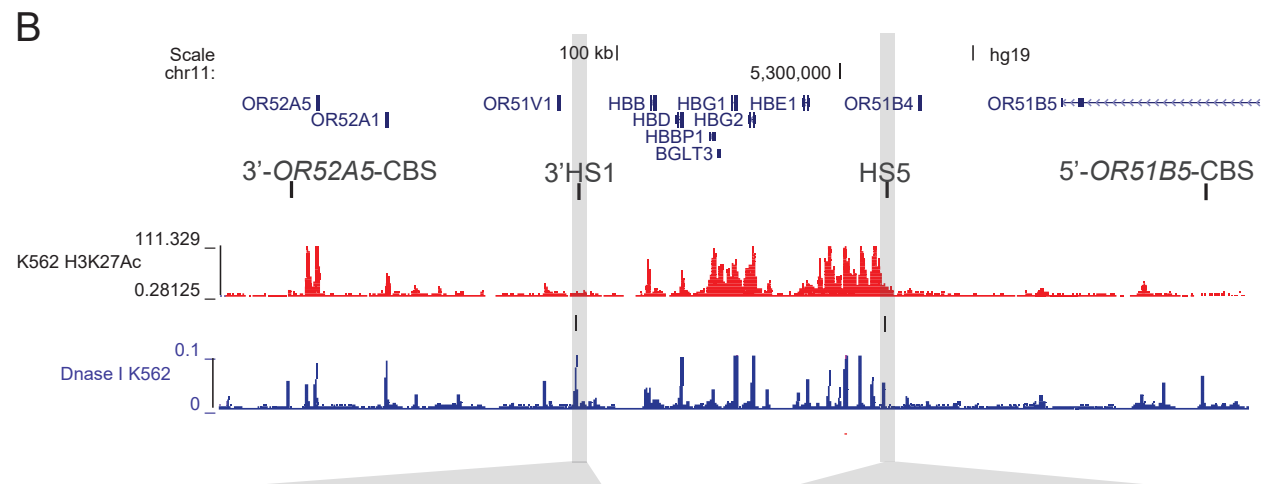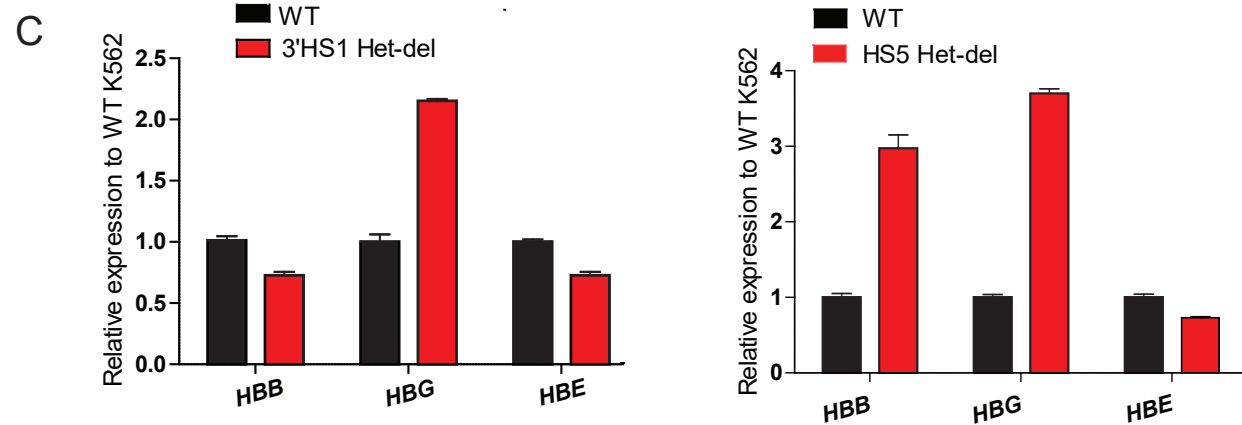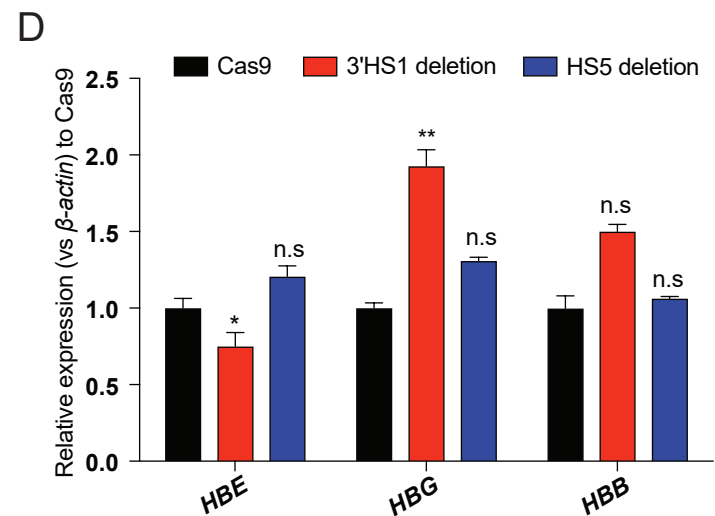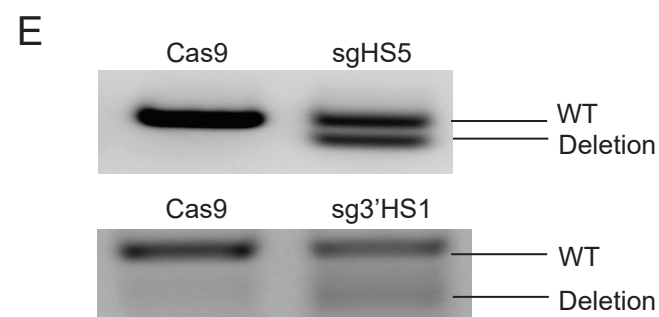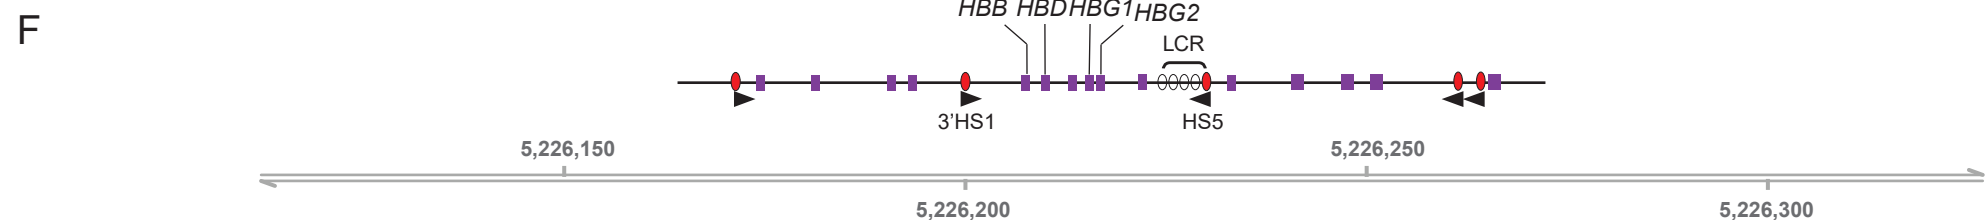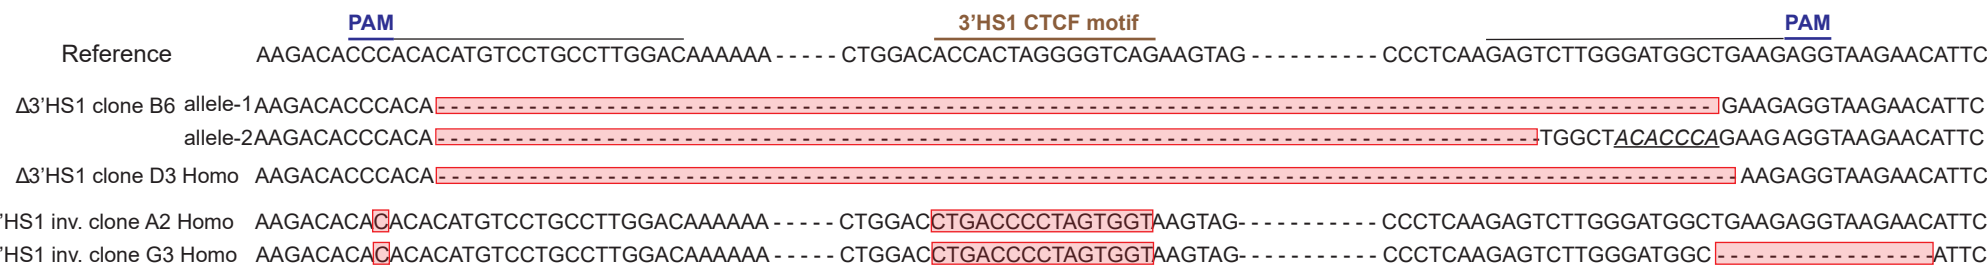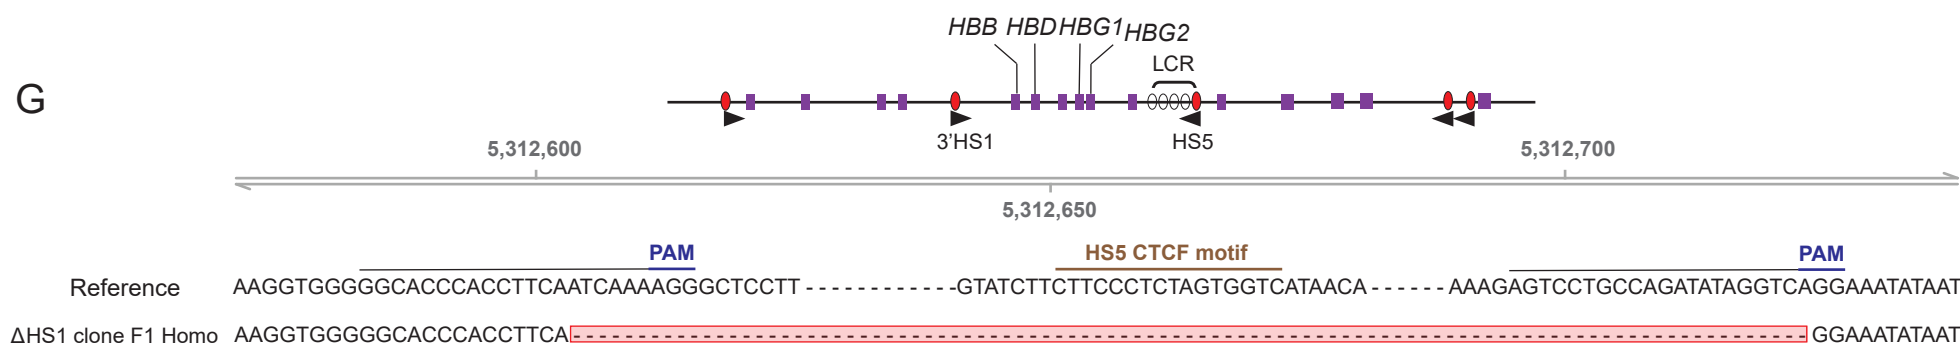

Supplement: supp [file elife-70557-supp-v1.zip]

A

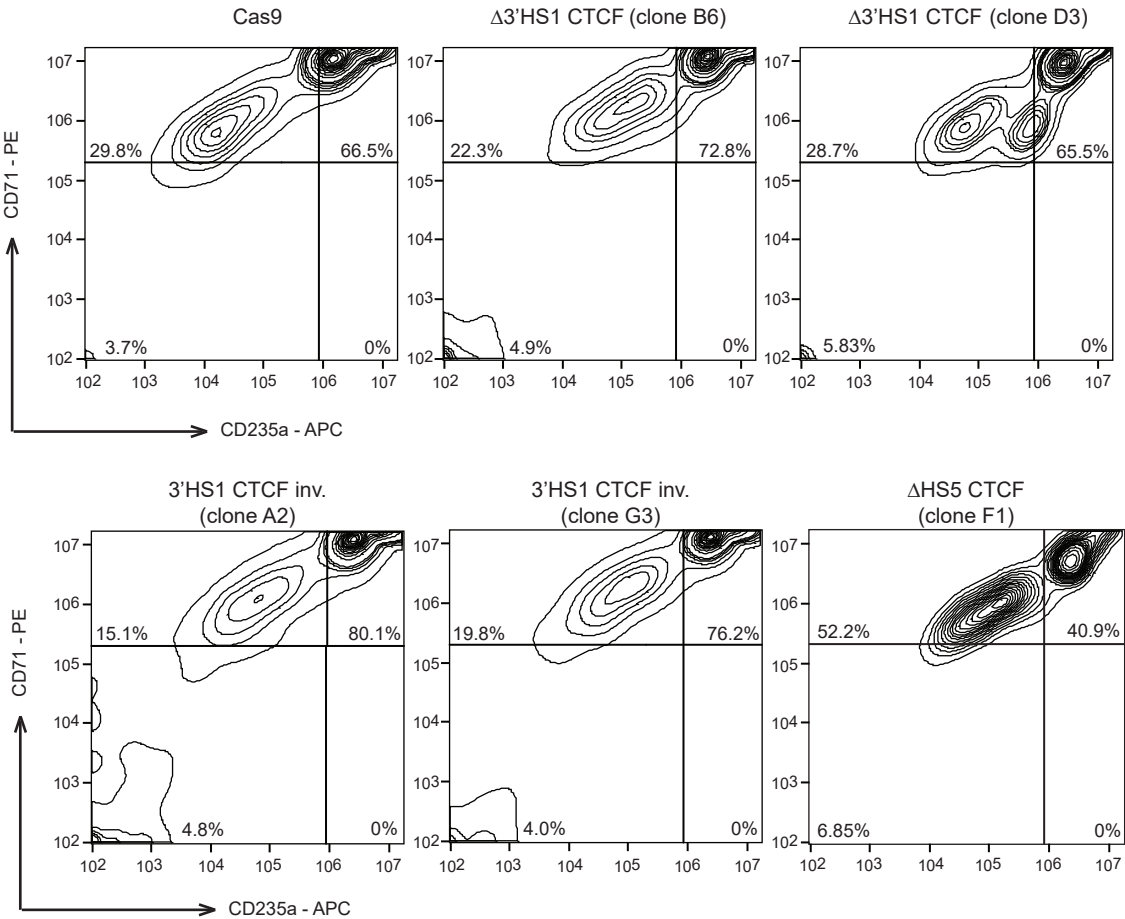

B

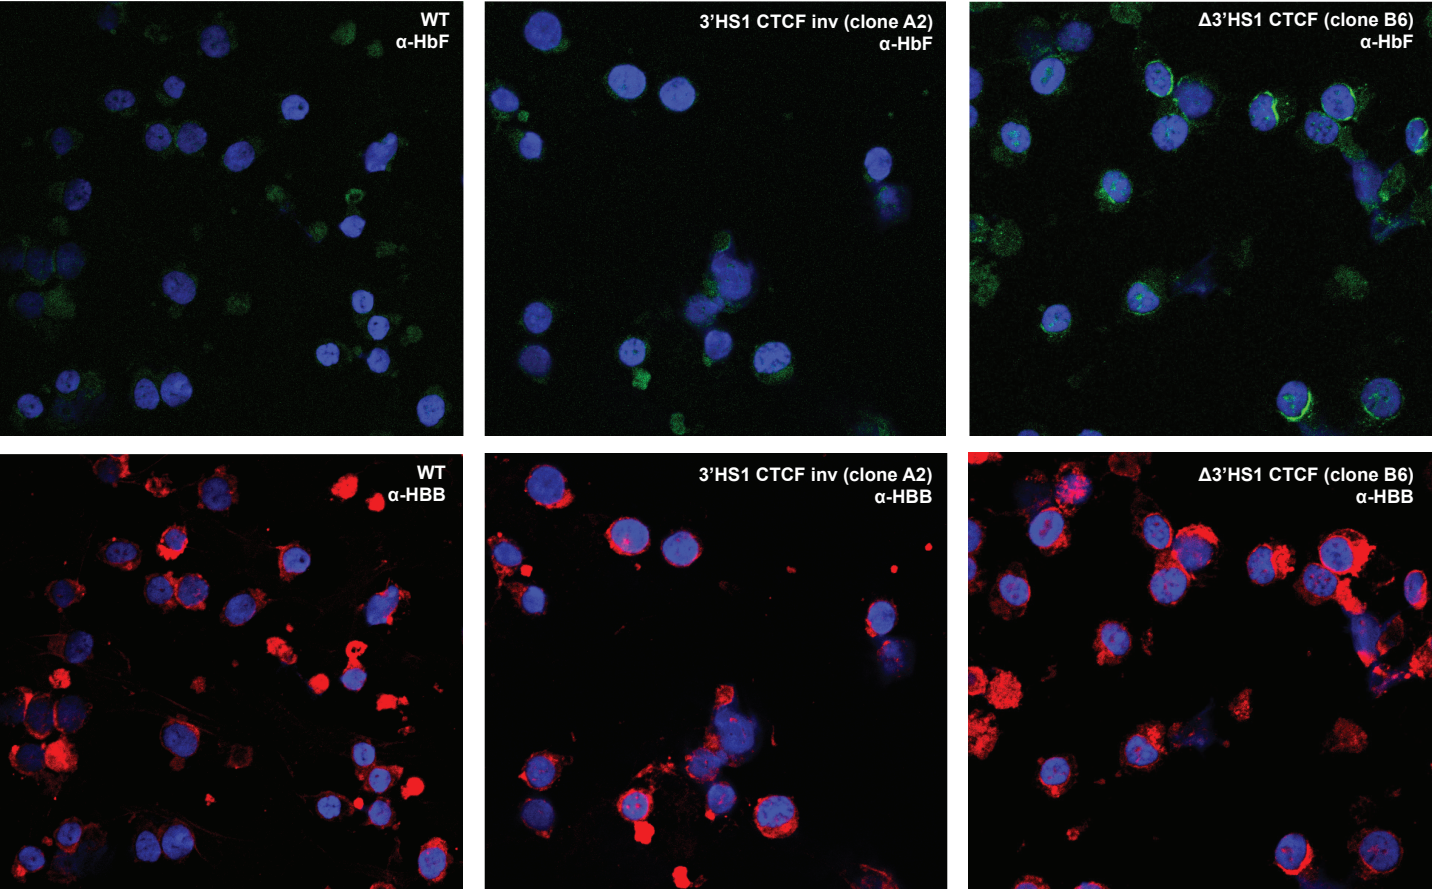

Supplement: supp [file elife-70557-supp-v1.zip]

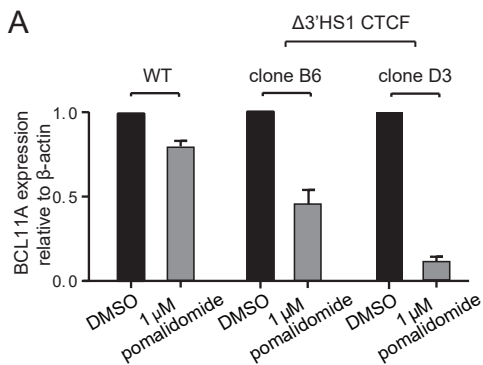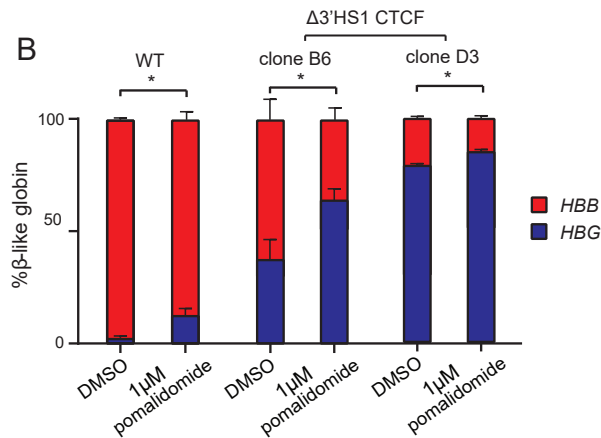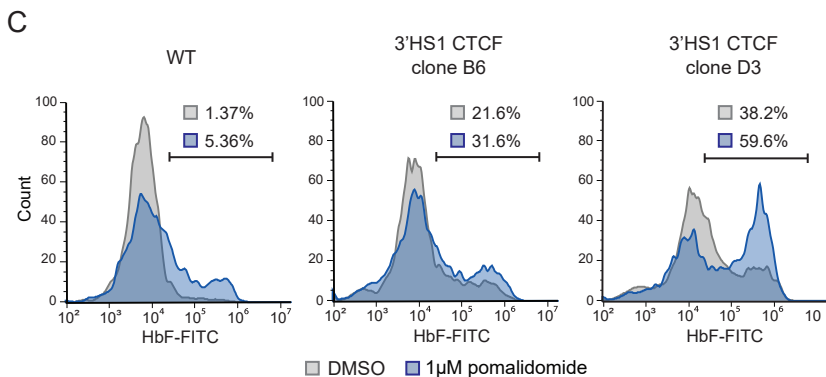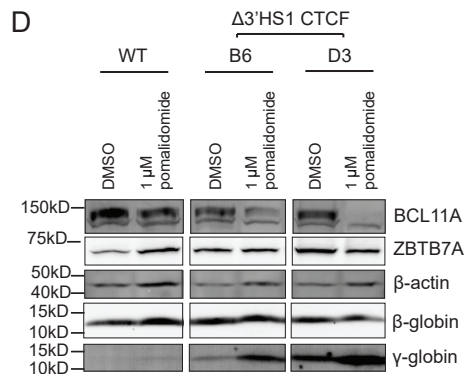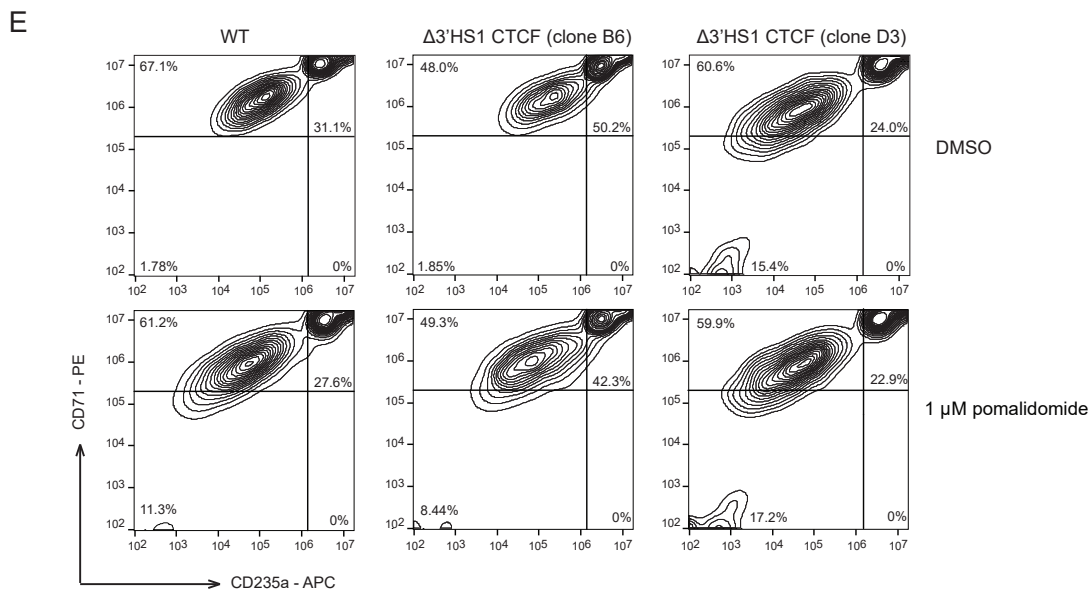

Supplement: supp [file elife-70557-supp-v1.zip]

A

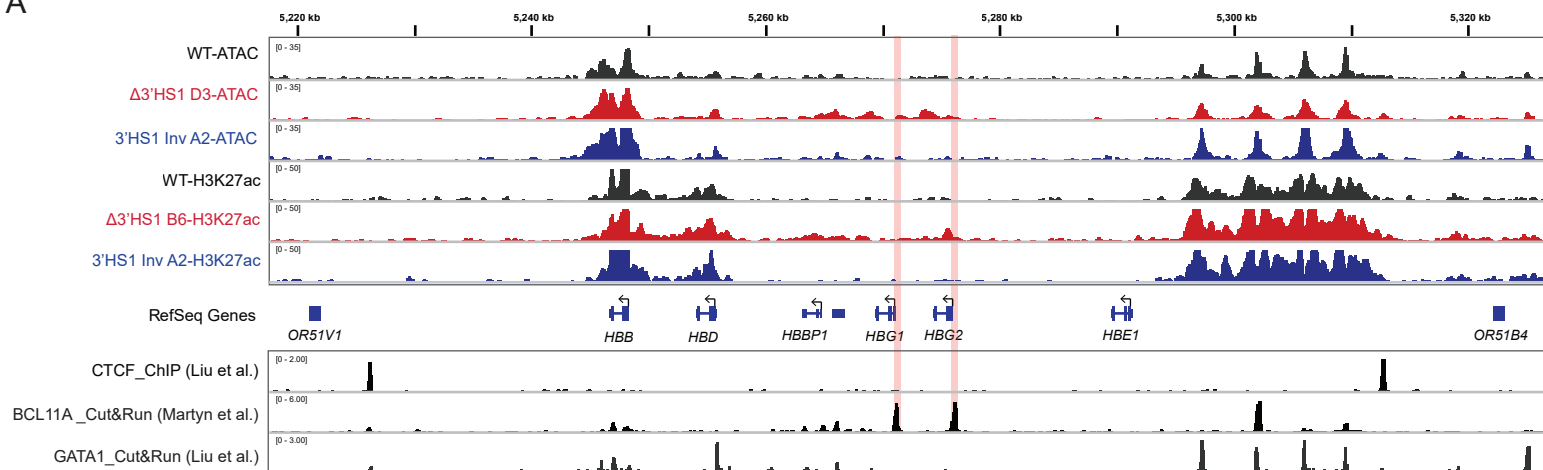

B

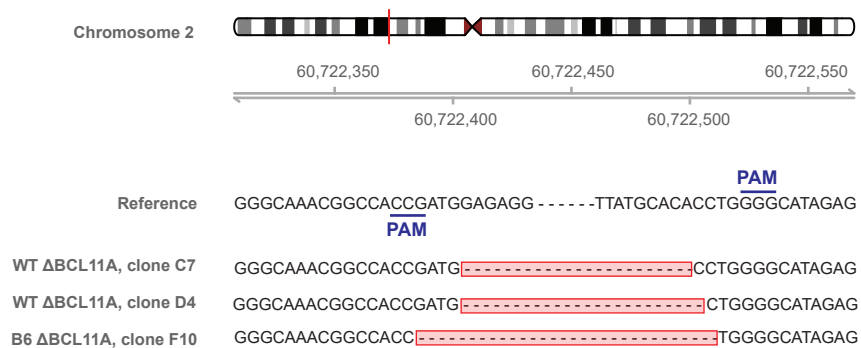

C

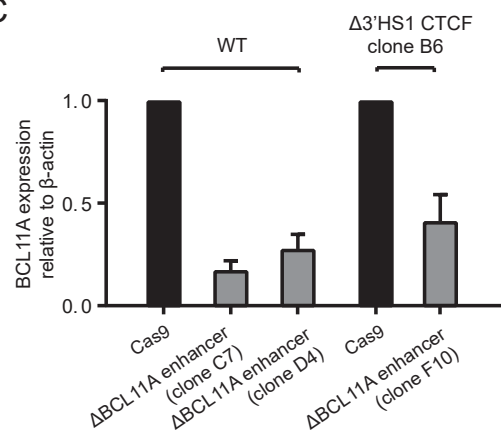

D

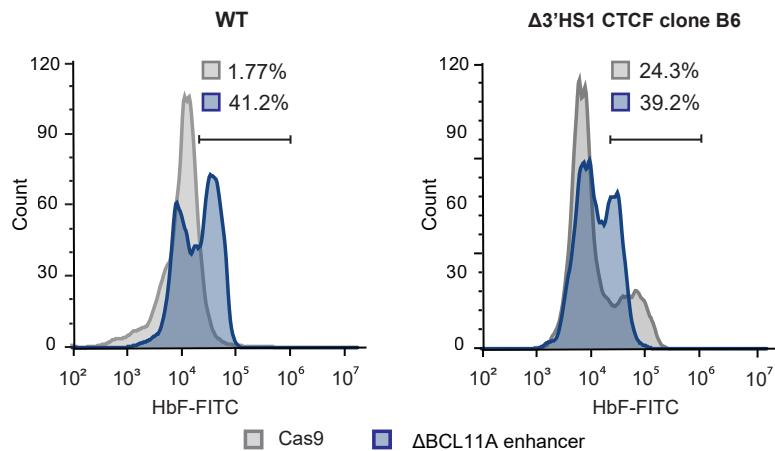

E

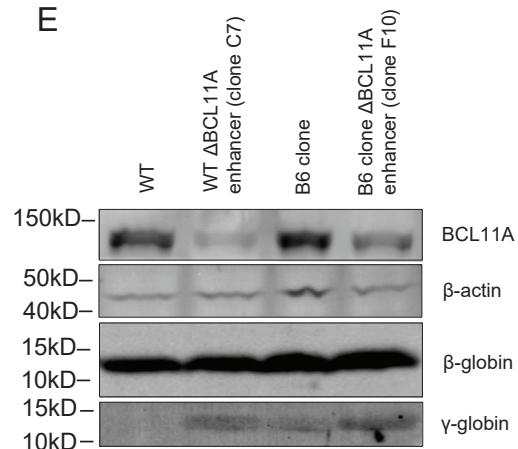

F

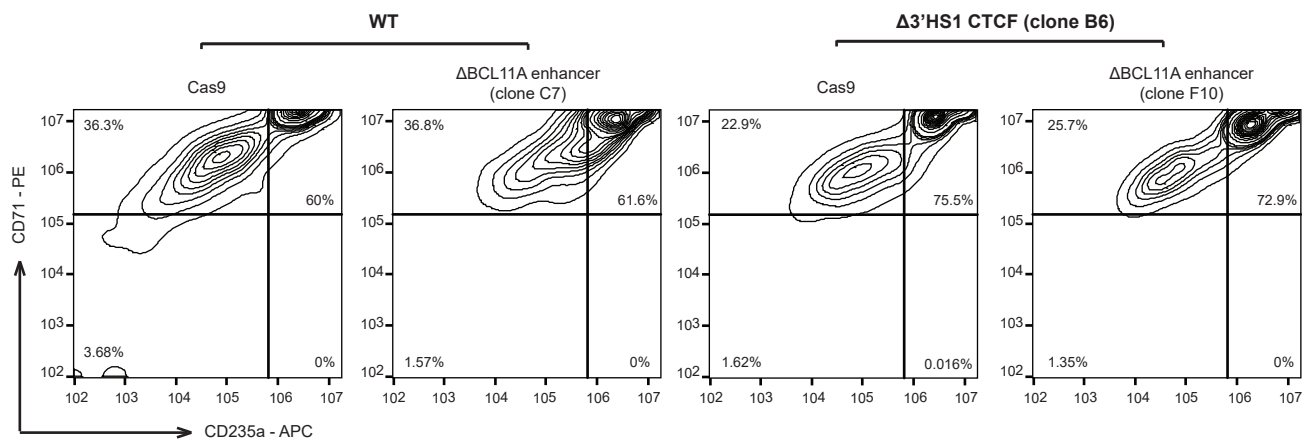

Supplement: supp [file elife-70557-supp-v1.zip]

# A

## mustache loops $q < 0.1$

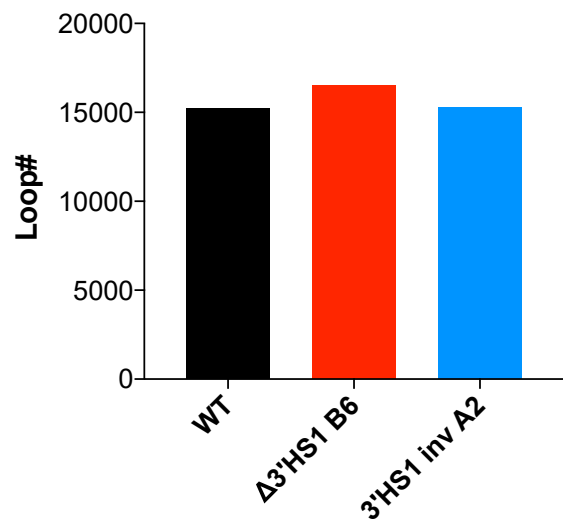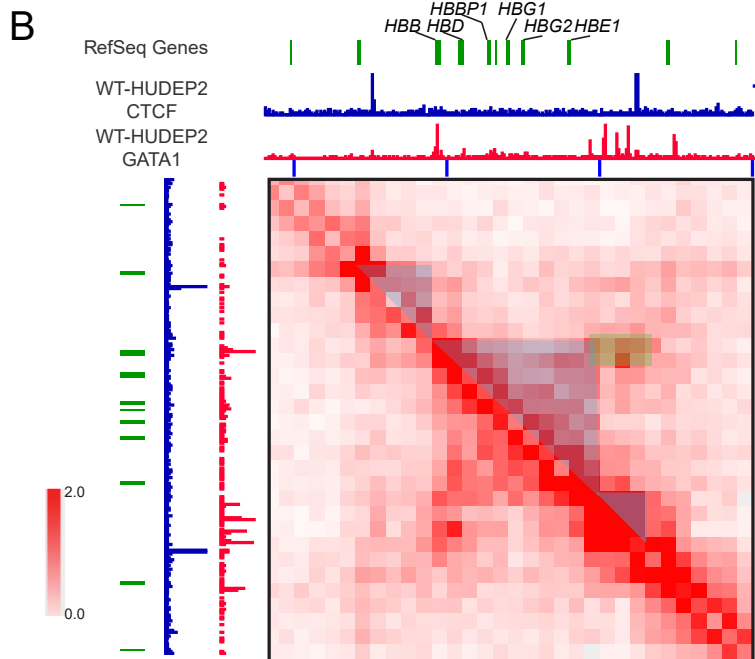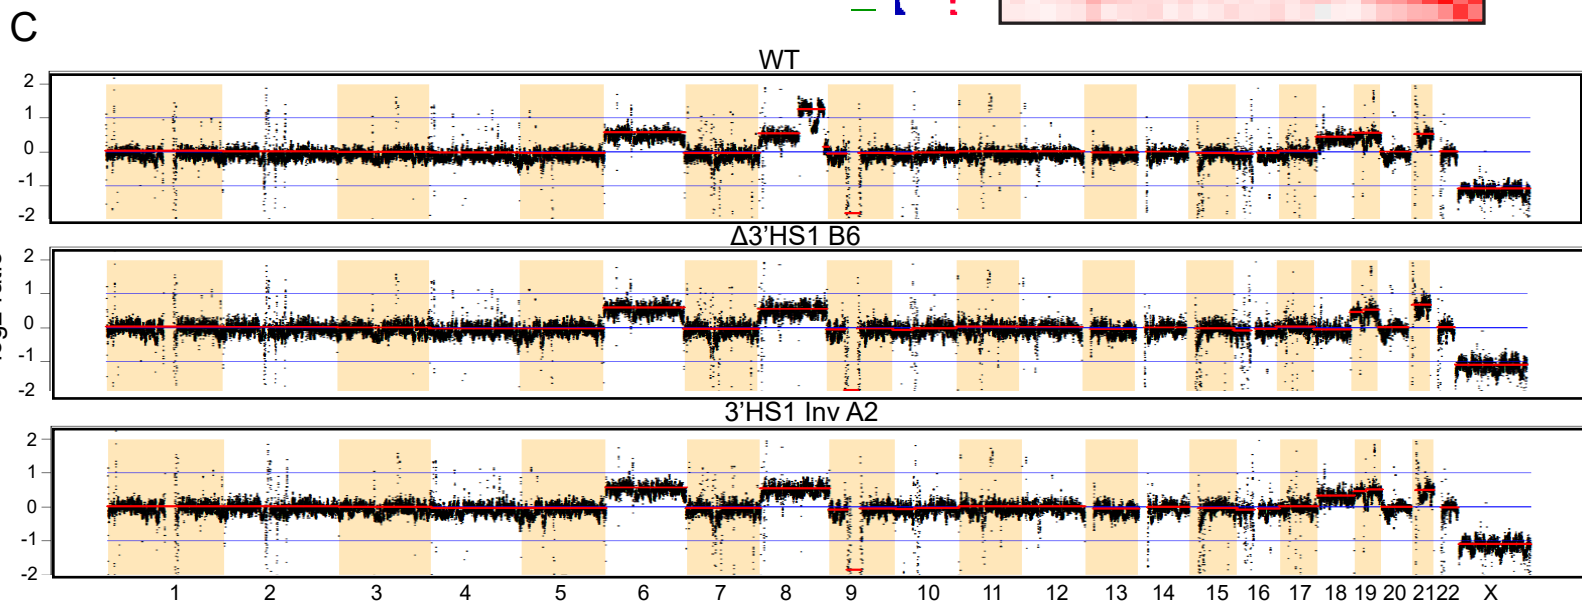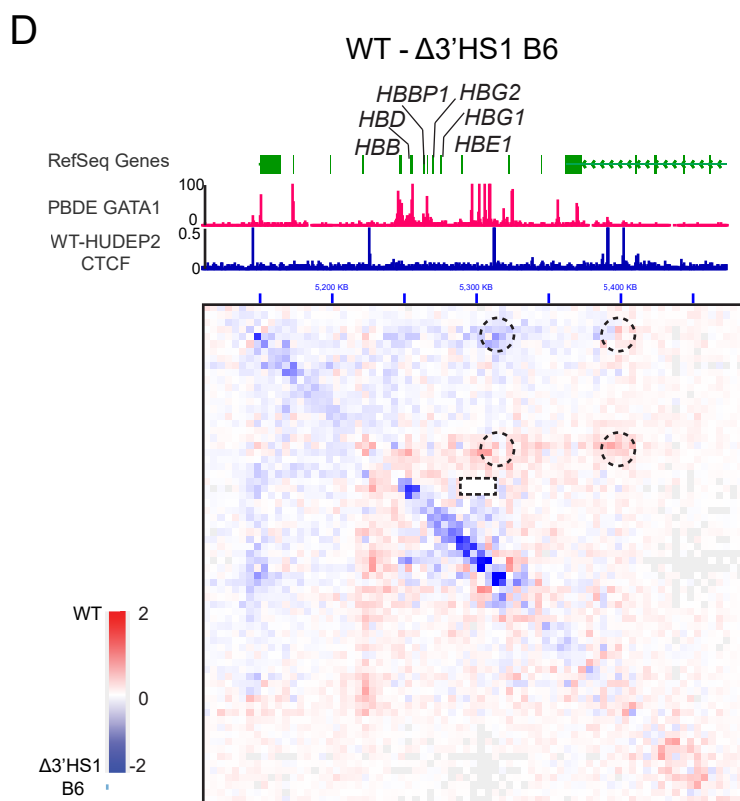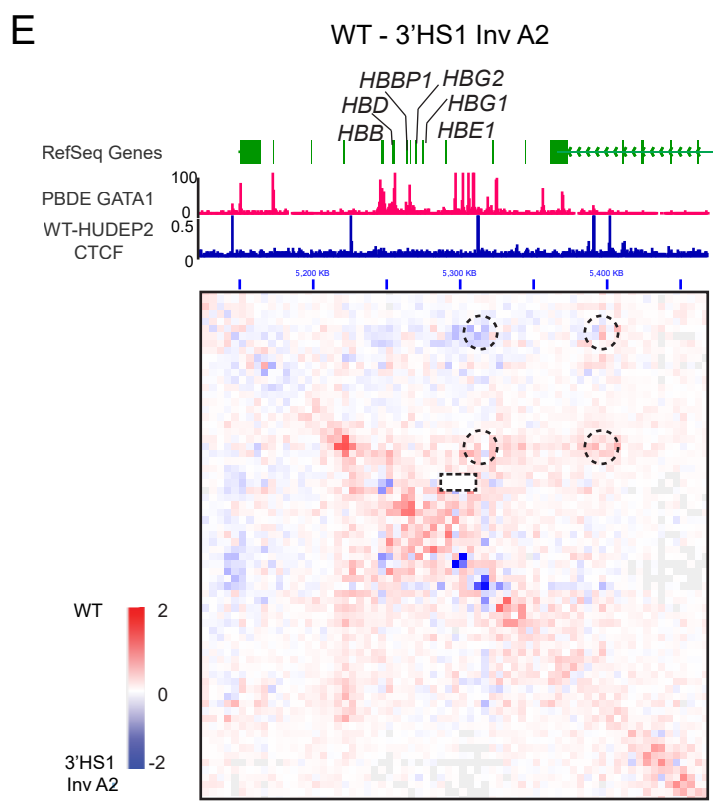

Supplement: supp [file elife-70557-supp-v1.zip]

A

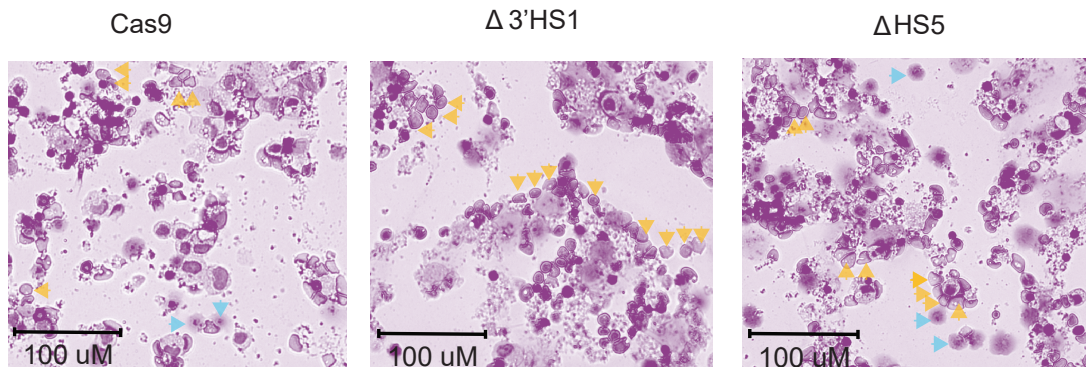

B

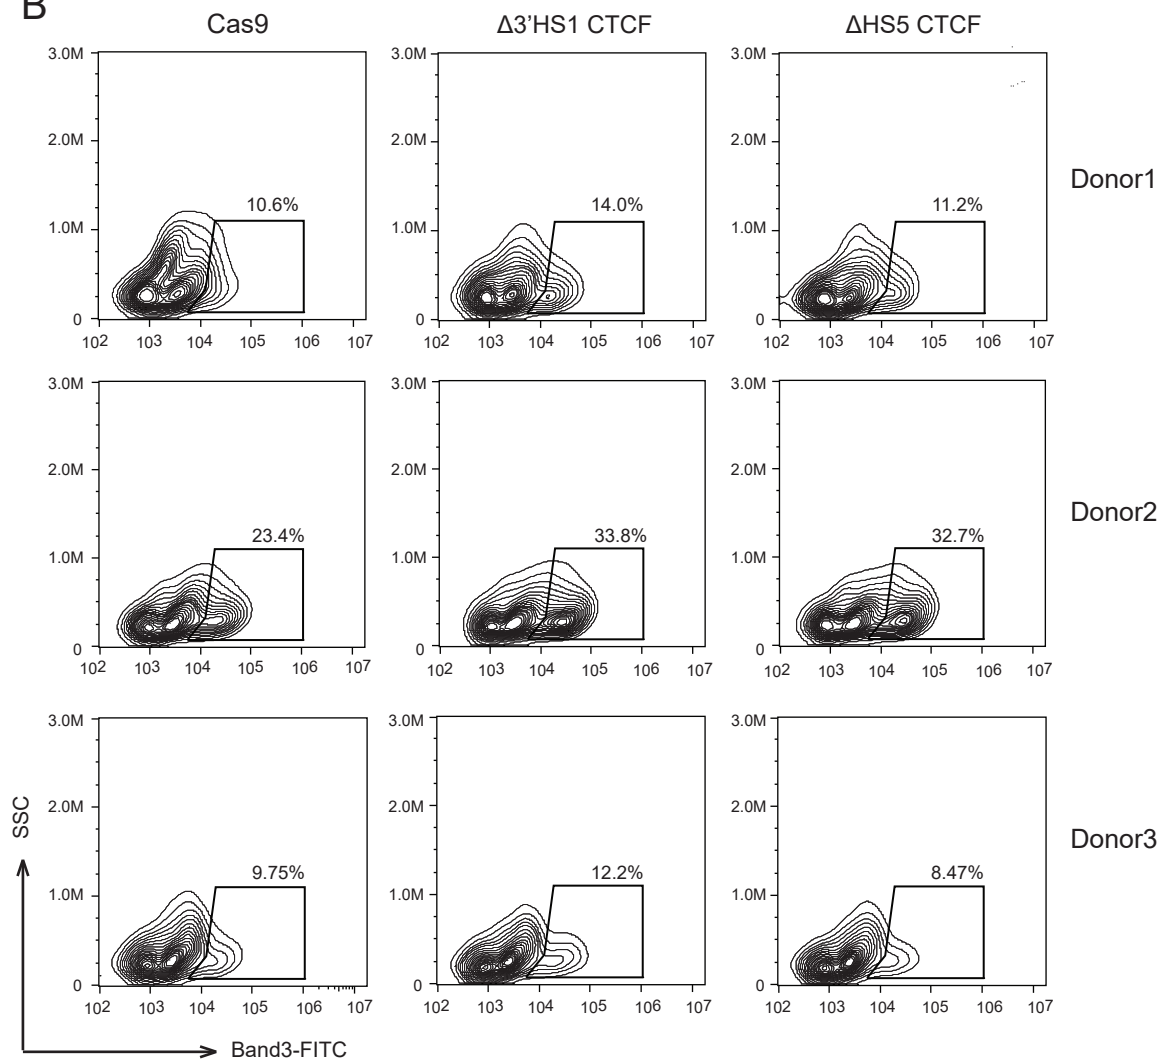

Supplement: supp [file elife-70557-supp-v1.zip]

**A**

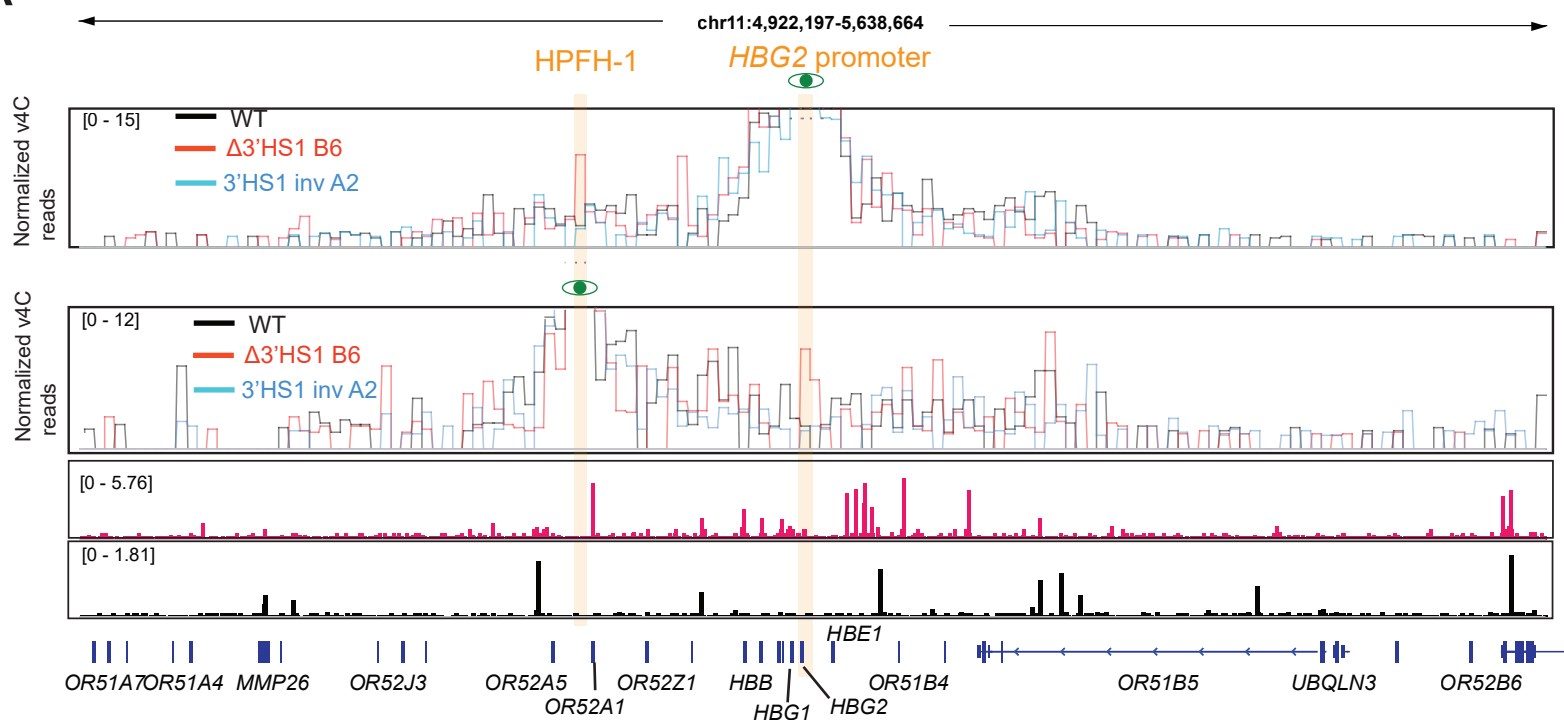

**B**

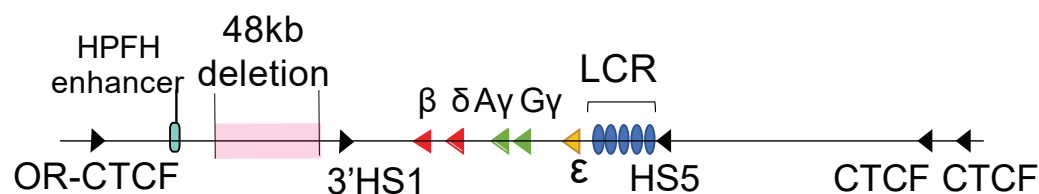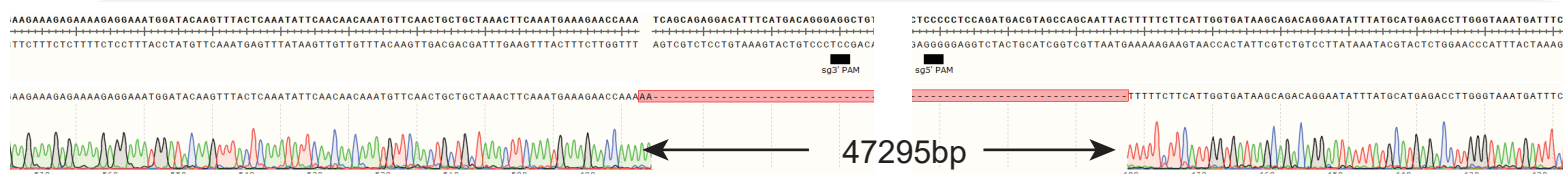

**C**

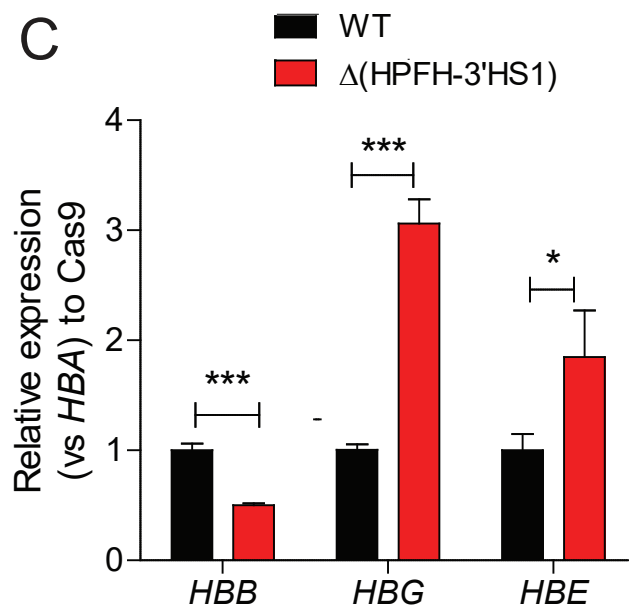

**D**

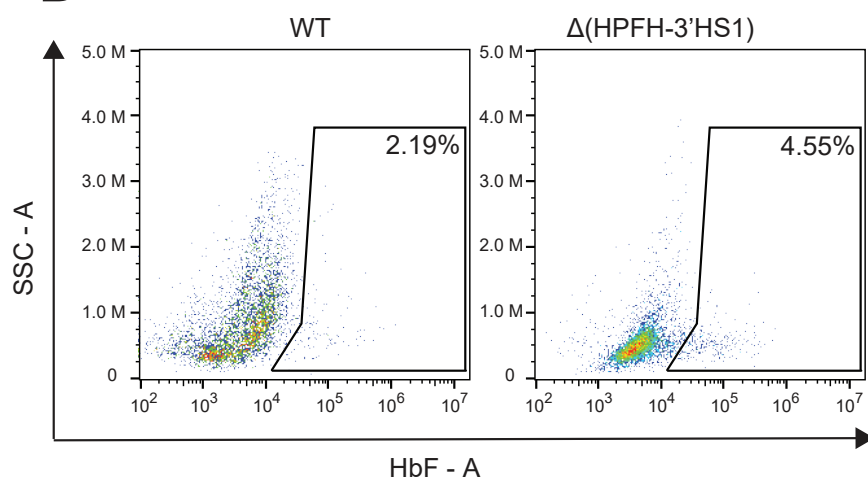

Supplement: supp [file elife-70557-supp-v1.zip]
